# Supplementary material
Source: PubMed Central journal article supplement (PMC6609963)
Supplement: DC190120SupplementaryData.pdf [file DC190120SupplementaryData.pdf]

## SUPPLEMENTARY DATA

**Supplementary Figure S1.** Adjusted hazard ratios (95% CI) glycated albumin and fructosamine with incident dementia – with additional adjustment for HbA1c

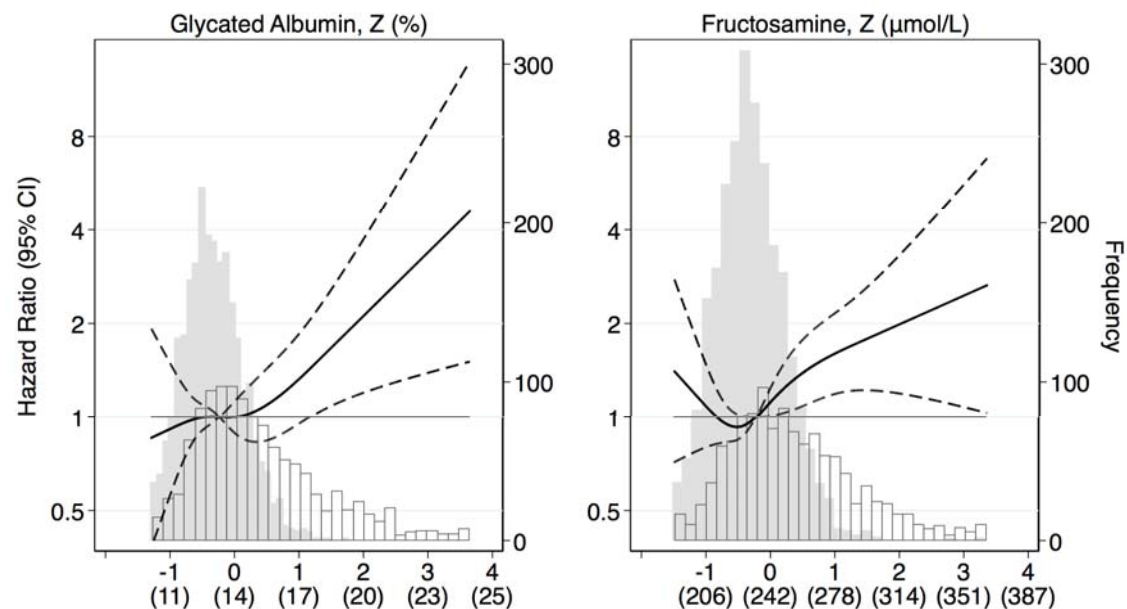

**Legend:** Biomarker values are shown as Z scores (original units). Hazard ratios (solid line) and 95% confidence intervals (dashed lines) are from Cox proportional hazard regression, adjusted for age, race, sex, education level, cigarette smoking status (current/former/never), drinking status (current/former/never), APOE e4 (0,1, or 2 alleles), hypertension (yes/no), history of stroke (yes/no), history of CHD (yes/no), and HbA1c. HbA1c was modeled using a restricted cubic spline with knots at the 10<sup>th</sup> (5.2%), 50<sup>th</sup> (5.7%), and 90<sup>th</sup> (6.9%) percentiles.

Each biomarker was modeled using a restricted cubic spline, with knots at the 5<sup>th</sup>, 35<sup>th</sup>, 65<sup>th</sup>, and 95<sup>th</sup> percentiles, and centered at the median.

Histograms of each biomarker are shown separately for persons without (solid bars) and with (outline bars) diabetes

Abbreviations: CI, confidence interval; HbA1c, hemoglobin A1c.

SUPPLEMENTARY DATA

**Supplementary Figure S2.** Adjusted hazard ratios (95% CI) for HbA1c, 1,5-anhydroglucitol, glycated albumin, and fructosamine with incident mild cognitive impairment

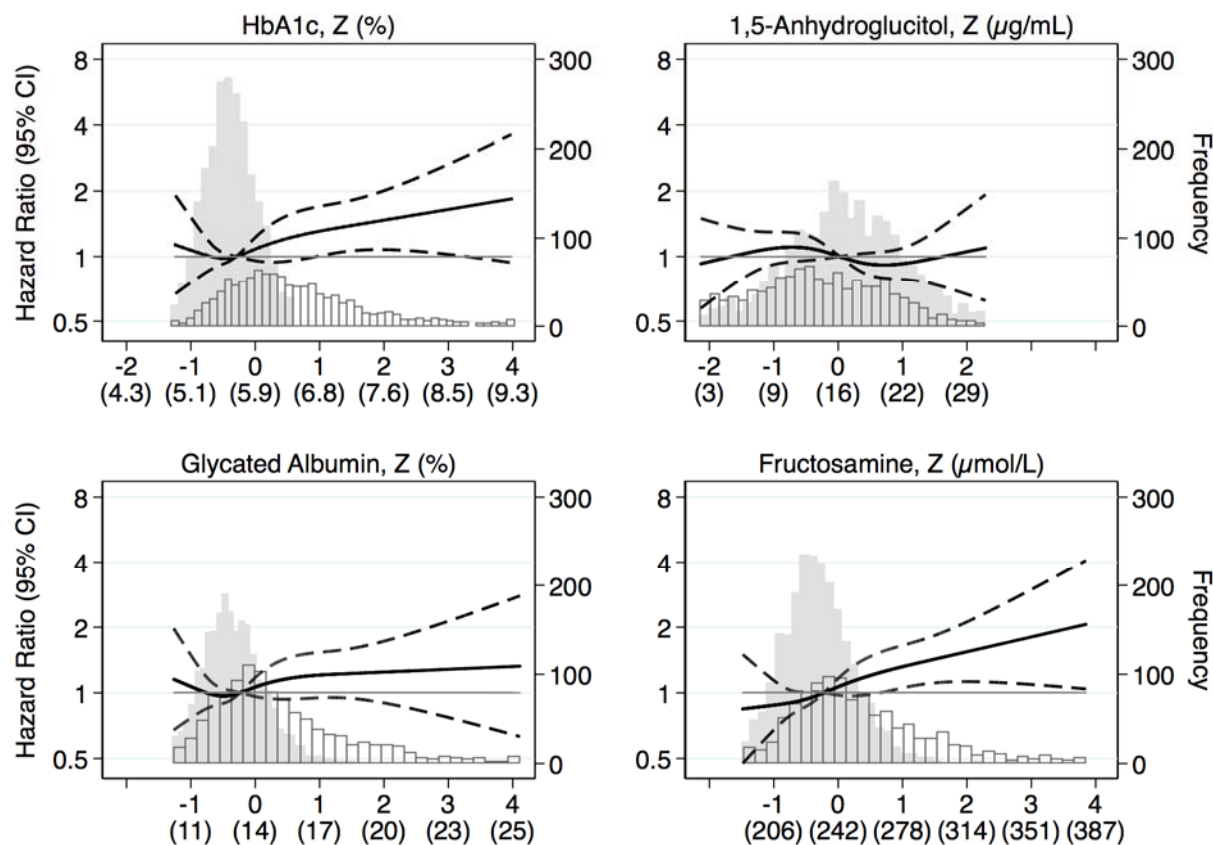

**Legend:** Biomarker values are shown as Z scores (original units). Hazard ratios (solid line) and 95% confidence intervals (dashed lines) are from Cox proportional hazard regression, adjusted for age, race, sex, education level, cigarette smoking status (current/former/never), drinking status (current/former/never), APOE e4 (0,1, or 2 alleles), hypertension (yes/no), history of stroke (yes/no), and history of CHD (yes/no). Each biomarker was modeled using a restricted cubic spline, with knots at the 5<sup>th</sup>, 35<sup>th</sup>, 65<sup>th</sup>, and 95<sup>th</sup> percentiles, and centered at the median. Histograms of each biomarker are shown separately for persons without (solid bars) and with (outline bars) diabetes. Abbreviations: CI, confidence interval; HbA1c, hemoglobin A1c.

SUPPLEMENTARY DATA

**Supplementary Table S1.** Adjusted hazard ratios (95% CI) for incident dementia among dementia-free persons with diabetes by baseline age tertiles and diabetes duration

| Baseline age (years) | Diabetes duration (years) | n/N            | Adjusted HR (95% CI)  | Adjusted HR (95% CI) comparing duration within age tertile |
|----------------------|---------------------------|----------------|-----------------------|------------------------------------------------------------|
| <72.8                | <6                        | 11/186 (5.9%)  | 1 (reference)         | 1 (reference)                                              |
|                      | 6-12                      | 15/199 (7.5%)  | 1.44 [0.66, 3.14]     | 1.44 [0.66, 3.14]                                          |
|                      | >12                       | 26/196 (13.3%) | 2.49 [1.23, 5.06]*    | 2.49 [1.23, 5.06]*                                         |
| 72.8 – 77.9          | <6                        | 16/163 (9.8%)  | 2.19 [1.01, 4.74]*    | 1 (reference)                                              |
|                      | 6-12                      | 25/199 (12.6%) | 2.70 [1.33, 5.51]**   | 1.23 [0.66, 2.31]                                          |
|                      | >12                       | 29/199 (14.6%) | 3.23 [1.61, 6.47]**   | 1.47 [0.80, 2.72]                                          |
| >77.9                | <6                        | 27/116 (23.3%) | 5.02 [2.48, 10.16]*** | 1 (reference)                                              |
|                      | 6-12                      | 28/152 (18.4%) | 4.94 [2.44, 9.98]***  | 0.98 [0.58, 1.67]                                          |
|                      | >12                       | 45/168 (26.8%) | 5.73 [2.95, 11.14]*** | 1.14 [0.70, 1.85]                                          |

Models are adjusted for age, race-center, sex, and education level

Diabetes was defined based on self-reported diagnosis, use of glucose lowering medication, or HbA1c of  $\geq 6.5\%$  (48 mmol/mol).

\* p-value < 0.05 \*\* p-value < 0.01 \*\*\* p-value < 0.001

SUPPLEMENTARY DATA

**Supplementary Table S2.** Adjusted hazard ratios (95% CI) for cognitive outcomes by glycemic – among participants who were cognitively normal at visit 5, using three categories of HbA1c

| Diabetes and glycemic control | Incident dementia |                   | Incident MCI     |                     |
|-------------------------------|-------------------|-------------------|------------------|---------------------|
|                               |                   |                   |                  |                     |
| No Diabetes                   | 164/2690 (6.1%)   | 1 (reference)     | 301/1938 (15.6%) | 1 (reference)       |
| Diabetes, A1c <7%             | 77/968 (8.0%)     | 1.03 [0.78, 1.38] | 105/655 (16.0%)  | 1.11 [0.88, 1.40]   |
| Diabetes, A1c 7-7.9%          | 16/225 (7.1 %)    | 0.95 [0.57, 1.61] | 31/142 (21.8%)   | 1.65 [1.13, 2.42]** |
| Diabetes, A1c ≥8%             | 16/111 (14.4%)    | 1.68 [0.95, 2.98] | 17/76 (22.4%)    | 1.89 [1.14, 3.14]*  |

Models are adjusted for age, race-center, sex, education level, cigarette smoking status (current/former/never), drinking status (current/former/never), APOE e4 (0,1, or 2 alleles), hypertension (yes/no), history of stroke (yes/no), and history of CHD (yes/no)

Diabetes was defined based on self-reported diagnosis, use of glucose lowering medication, or HbA1c of ≥6.5% (48 mmol/mol). HbA1c of 7% is equivalent to 53 mmol/mol, HbA1c of 8% is equivalent to 64 mmol/mol.

Abbreviations: HR, hazard ratio; MCI, mild cognitive impairment.

\* p-value < 0.05 \*\* p-value < 0.01 \*\*\* p-value < 0.001

SUPPLEMENTARY DATA

**Supplemental Table S3.** Adjusted hazard ratios (95% CI) for cognitive outcomes by baseline cognitive status, using three categories of HbA1c

| Diabetes and glycemic control | Incident cognitive impairment† among participants dementia free at baseline |                      | Incident dementia among participants with MCI at baseline |                    |
|-------------------------------|-----------------------------------------------------------------------------|----------------------|-----------------------------------------------------------|--------------------|
|                               |                                                                             |                      |                                                           |                    |
| No Diabetes                   | 638/3344 (19.1%)                                                            | 1 (reference)        | 169/639 (26.4%)                                           | 1 (reference)      |
| Diabetes, A1c <7%             | 264/1276 (20.7%)                                                            | 1.06 [0.91, 1.23]    | 81/305 (26.6%)                                            | 1.03 [0.78, 1.35]  |
| Diabetes, A1c 7-7.9%          | 72/306 (23.5%)                                                              | 1.17 [0.91, 1.50]    | 25/80 (31.3%)                                             | 1.20 [0.77, 1.85]  |
| Diabetes, A1c ≥8%             | 47/153 (30.7%)                                                              | 1.95 [1.42, 2.66]*** | 14/42 (33.3%)                                             | 1.91 [1.08, 3.36]* |

† Cognitive impairment includes incident MCI in persons cognitively normal at baseline and incident dementia in persons cognitively normal or MCI at baseline

Models are adjusted for age, race-center, sex, education level, cigarette smoking status (current/former/never), drinking status (current/former/never), APOE e4 (0,1, or 2 alleles), hypertension (yes/no), history of stroke (yes/no), and history of CHD (yes/no)

Diabetes was defined based on self-reported diagnosis, use of glucose lowering medication, or HbA1c of ≥6.5% (48 mmol/mol). HbA1c of 7% is equivalent to 53 mmol/mol, HbA1c of 8% is equivalent to 64 mmol/mol.

Abbreviations: HR, hazard ratio; MCI, mild cognitive impairment;

\* p-value < 0.05 \*\* p-value < 0.01 \*\*\* p-value <0.001
